# Supplementary material for: Cascade Förster Resonance Energy Transfer Studies for Enhancement of Light Harvesting on Dye-Sensitized Solar Cells
Source: MDPI journal article supplement (doi:10.3390/nano12224085), 2022-11-20
Supplement: s1 [file s1]

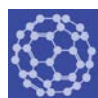

# Cascade Förster Resonance Energy Transfer Studies for Enhancement of Light Harvesting on Dye-Sensitized Solar Cells

Mulugeta Tesema Efa <sup>1,†</sup>, Jheng-Chang Huang <sup>2,†</sup> and Toyoko Imae <sup>1,2,\*</sup>

<sup>1</sup> Graduate Institute of Applied Science and Technology, National Taiwan University of Science and Technology, Taipei 10607, Taiwan

<sup>2</sup> Department of Chemical Engineering, National Taiwan University of Science and Technology, Taipei 10607, Taiwan

\* Correspondence: imae@mail.ntust.edu.tw

† These authors contributed equally to this work.

**Table S1.** Evaluated parameters for mixing solutions of Py, AC and AO. (V: volume).

| Solution     | V <sub>Py</sub><br>(mL) | V <sub>AC</sub><br>(mL) | V <sub>AO</sub><br>(mL) | V <sub>T</sub><br>(mL) | [Py]<br>(μM) | [AC]<br>(mM) | [AO]<br>(mM) | V <sub>AC</sub><br>(mL) | V <sub>AO</sub><br>(mL) | V <sub>Py</sub><br>(mL) | V <sub>T</sub><br>(mL) | [Py]<br>(μM) | [AC]<br>(mM) | [AO]<br>(mM) |
|--------------|-------------------------|-------------------------|-------------------------|------------------------|--------------|--------------|--------------|-------------------------|-------------------------|-------------------------|------------------------|--------------|--------------|--------------|
| Py           | 5.00                    | 0.00                    | 0.0                     | 5.00                   | 3.00         | 0.000        | 0.00         | 5.00                    | 0.00                    | 0.0                     | 5.00                   | 0.0          | 3.00         | 0.000        |
| Py + AC      | 5.00                    | 0.02                    | 0.0                     | 5.02                   | 2.98         | 0.011        | 0.0          | 5.00                    | 0.02                    | 0.0                     | 5.02                   | 0.0          | 2.99         | 0.011        |
| Py + AC      | 5.00                    | 0.04                    | 0.0                     | 5.04                   | 2.97         | 0.023        | 0.0          | 5.00                    | 0.04                    | 0.0                     | 5.04                   | 0.0          | 2.98         | 0.023        |
| Py + AC      | 5.00                    | 0.06                    | 0.0                     | 5.06                   | 2.96         | 0.035        | 0.0          | 5.00                    | 0.06                    | 0.0                     | 5.06                   | 0.0          | 2.97         | 0.035        |
| Py + AC      | 5.00                    | 0.08                    | 0.0                     | 5.08                   | 2.95         | 0.047        | 0.0          | 5.00                    | 0.08                    | 0.0                     | 5.08                   | 0.0          | 2.95         | 0.047        |
| Py + AC      | 5.00                    | 0.10                    | 0.0                     | 5.10                   | 2.94         | 0.058        | 0.0          | 5.00                    | 0.10                    | 0.0                     | 5.10                   | 0.0          | 2.94         | 0.058        |
| Py + AC      | 5.00                    | 0.16                    | 0.0                     | 5.16                   | 2.90         | 0.090        | 0.0          | 5.00                    | 0.16                    | 0.0                     | 5.16                   | 0.0          | 2.90         | 0.090        |
| Py + AC      | 5.00                    | 0.18                    | 0.0                     | 5.18                   | 2.89         | 0.100        | 0.0          | 5.00                    | 0.18                    | 0.0                     | 5.18                   | 0.0          | 2.89         | 0.100        |
| Py + AC      | 5.00                    | 0.20                    | 0.0                     | 5.20                   | 2.88         | 0.120        | 0.0          | 5.00                    | 0.20                    | 0.0                     | 5.20                   | 0.0          | 2.88         | 0.120        |
| Py + AC      | 5.00                    | 0.22                    | 0.0                     | 5.22                   | 2.87         | 0.130        | 0.0          | 5.00                    | 0.00                    | 0.0                     | 5.22                   | 0.0          | 2.70         | 0.13         |
| Py + AC + AO | 5.00                    | 0.00                    | 0.00                    | 5.00                   | 3.00         | 3.000        | 3.0000       | 0.0                     | 0.00                    | 5.00                    | 5.00                   | 3.00         | 0.0          | 0.000        |
| Py + AC + AO | 5.00                    | 0.22                    | 0.02                    | 5.24                   | 2.97         | 0.125        | 0.0114       | 0.0                     | 0.02                    | 5.00                    | 5.02                   | 2.99         | 0.0          | 0.011        |
| Py + AC + AO | 5.00                    | 0.22                    | 0.04                    | 5.26                   | 2.96         | 0.125        | 0.00114      | 0.0                     | 0.04                    | 5.00                    | 5.04                   | 2.98         | 0.0          | 0.023        |
| Py + AC + AO | 5.00                    | 0.22                    | 0.06                    | 5.28                   | 2.95         | 0.125        | 0.0113       | 0.0                     | 0.06                    | 5.00                    | 5.06                   | 2.97         | 0.0          | 0.035        |
| Py + AC + AO | 5.00                    | 0.22                    | 0.08                    | 5.30                   | 2.95         | 0.124        | 0.0113       | 0.0                     | 0.08                    | 5.00                    | 5.08                   | 2.95         | 0.0          | 0.047        |
| Py + AC + AO | 5.00                    | 0.22                    | 0.10                    | 5.32                   | 2.94         | 0.124        | 0.00112      | 0.0                     | 0.10                    | 5.00                    | 5.10                   | 2.94         | 0.0          | 0.058        |
| Py + AC + AO | 5.00                    | 0.22                    | 0.16                    | 5.38                   | 2.92         | 0.122        | 0.00111      | 0.0                     | 0.16                    | 5.00                    | 5.16                   | 2.90         | 0.0          | 0.090        |
| Py + AC + AO | 5.00                    | 0.22                    | 0.18                    | 5.40                   | 2.89         | 0.122        | 0.00111      | 0.0                     | 0.18                    | 5.00                    | 5.18                   | 2.89         | 0.0          | 0.100        |
| Py + AC + AO | 5.00                    | 0.22                    | 0.20                    | 5.42                   | 2.87         | 0.121        | 0.00110      | 0.0                     | 0.20                    | 5.00                    | 5.20                   | 2.88         | 0.0          | 0.120        |
| Py + AC + AO | 5.00                    | 0.22                    | 0.22                    | 5.44                   | 2.86         | 0.121        | 0.00110      | 0.0                     | 0.22                    | 5.00                    | 5.22                   | 2.70         | 0.0          | 0.130        |

**Table S2.** Evaluated parameters for mixed solutions of Py (3.5 μM), AC (4.9 mM) and AO (4.9 mM). (V: volume).

| Solution | V <sub>Py</sub><br>(mL) | V <sub>AC</sub><br>(mL) | V <sub>AO</sub><br>(mL) | $\Phi$ | $\Phi_T$ | $r_1$<br>(Å) | $r_3$<br>(Å) | $k_T(10^{-3})$<br>(ns) | $r_1/R_{01}$ | $\Phi_{st}/\Phi$ |
|----------|-------------------------|-------------------------|-------------------------|--------|----------|--------------|--------------|------------------------|--------------|------------------|
| Py       | 5.00                    | 0.00                    | 0.00                    | 0.650  | 0.000    | —            | —            | —                      | —            | 1.000            |
| Py + AC  | 5.00                    | 0.02                    | 0.00                    | 0.501  | 0.229    | 53.113       | —            | 0.723                  | 1.225        | 1.297            |
| Py + AC  | 5.00                    | 0.04                    | 0.00                    | 0.382  | 0.412    | 46.038       | —            | 1.710                  | 1.061        | 1.699            |
| Py + AC  | 5.00                    | 0.06                    | 0.00                    | 0.312  | 0.521    | 42.780       | —            | 2.650                  | 0.986        | 2.086            |
| Py + AC  | 5.00                    | 0.08                    | 0.00                    | 0.239  | 0.633    | 39.616       | —            | 4.200                  | 0.913        | 2.723            |
| Py + AC  | 5.00                    | 0.10                    | 0.00                    | 0.181  | 0.722    | 37.006       | —            | 6.320                  | 0.853        | 3.593            |
| Py + AC  | 5.00                    | 0.12                    | 0.00                    | 0.152  | 0.767    | 35.572       | —            | 8.020                  | 0.820        | 4.287            |
| Py + AC  | 5.00                    | 0.14                    | 0.00                    | 0.112  | 0.827    | 33.413       | —            | 11.670                 | 0.770        | 5.786            |

|               |      |      |      |       |       |        |        |        |       |        |
|---------------|------|------|------|-------|-------|--------|--------|--------|-------|--------|
| Py + AC       | 5.00 | 0.16 | 0.00 | 0.098 | 0.849 | 32.531 | —      | 13.700 | 0.750 | 6.619  |
| Py + AC       | 5.00 | 0.18 | 0.00 | 0.077 | 0.882 | 31.033 | —      | 18.180 | 0.715 | 8.455  |
| Py + AC*      | 5.00 | 0.20 | 0.00 | 0.068 | 0.895 | 30.323 | —      | 20.890 | 0.699 | 9.567  |
| Py + AC + AO  | 5.00 | 0.00 | 0.02 | 0.064 | 0.902 | 29.967 | 19.718 | 22.430 | 0.691 | 10.195 |
| Py + AC + AO  | 5.00 | 0.00 | 0.04 | 0.060 | 0.908 | 29.615 | 19.486 | 24.070 | 0.683 | 10.870 |
| Py + AC + AO  | 5.00 | 0.00 | 0.06 | 0.054 | 0.916 | 29.108 | 19.153 | 26.700 | 0.671 | 11.947 |
| Py + AC + AO  | 5.00 | 0.00 | 0.08 | 0.051 | 0.921 | 28.799 | 18.949 | 28.470 | 0.664 | 12.673 |
| Py + AC + AO  | 5.00 | 0.00 | 0.10 | 0.047 | 0.927 | 28.373 | 18.669 | 31.130 | 0.654 | 13.763 |
| Py + AC + AO  | 5.00 | 0.00 | 0.12 | 0.044 | 0.932 | 28.061 | 18.464 | 33.270 | 0.647 | 14.639 |
| Py + AC + AO  | 5.00 | 0.00 | 0.14 | 0.040 | 0.938 | 27.551 | 18.128 | 37.140 | 0.635 | 16.226 |
| Py + AC + AO  | 5.00 | 0.00 | 0.16 | 0.037 | 0.942 | 27.226 | 17.914 | 39.880 | 0.628 | 17.349 |
| Py + AC + AO  | 5.00 | 0.00 | 0.18 | 0.036 | 0.945 | 26.992 | 17.761 | 41.990 | 0.622 | 18.218 |
| Py + AC + AO* | 5.00 | 0.00 | 0.20 | 0.034 | 0.947 | 26.789 | 17.627 | 43.950 | 0.618 | 19.019 |

**Table S3.** Evaluated parameters for mixed solutions of Py (5  $\mu$ M), AC (7 mM) and AO (7 mM). (V: volume).

| Solution             | V <sub>Py</sub><br>(mL) | V <sub>AC</sub><br>(mL) | V <sub>AO</sub><br>(mL) | $\Phi$ | $\Phi_r$ | $r_1$<br>(Å) | $r_3$<br>(Å) | $k_T (10^{-3})$<br>(ns) | $r_1/R_{01}$ | $\Phi_{st}/\Phi$ |
|----------------------|-------------------------|-------------------------|-------------------------|--------|----------|--------------|--------------|-------------------------|--------------|------------------|
| Py                   | 5.00                    | 0.00                    | 0.00                    | 0.650  | 0.000    | —            | —            | —                       | —            | 1.000            |
| Py + AC              | 5.00                    | 0.02                    | 0.00                    | 0.450  | 0.307    | 49.669       | —            | 1.080                   | 1.145        | 1.443            |
| Py + AC              | 5.00                    | 0.04                    | 0.00                    | 0.342  | 0.474    | 44.134       | —            | 2.200                   | 1.018        | 1.901            |
| Py + AC              | 5.00                    | 0.06                    | 0.00                    | 0.269  | 0.564    | 40.908       | —            | 3.470                   | 0.943        | 2.421            |
| Py + AC              | 5.00                    | 0.08                    | 0.00                    | 0.209  | 0.587    | 38.290       | —            | 5.150                   | 0.883        | 3.113            |
| Py + AC              | 5.00                    | 0.10                    | 0.00                    | 0.152  | 0.766    | 35.584       | —            | 8.000                   | 0.820        | 4.280            |
| Py + AC              | 5.00                    | 0.12                    | 0.00                    | 0.117  | 0.820    | 33.691       | —            | 11.100                  | 0.777        | 5.553            |
| Py + AC              | 5.00                    | 0.14                    | 0.00                    | 0.097  | 0.851    | 32.431       | —            | 13.960                  | 0.748        | 6.724            |
| Py + AC              | 5.00                    | 0.16                    | 0.00                    | 0.075  | 0.884    | 30.895       | —            | 18.680                  | 0.712        | 8.657            |
| Py + AC              | 5.00                    | 0.18                    | 0.00                    | 0.062  | 0.905    | 29.814       | —            | 23.130                  | 0.687        | 10.482           |
| Py + AC*             | 5.00                    | 0.20                    | 0.00                    | 0.049  | 0.925    | 28.551       | —            | 29.980                  | 0.658        | 13.294           |
| Py + AC + AO         | 5.00                    | 0.00                    | 0.02                    | 0.046  | 0.929    | 28.281       | 18.609       | 31.740                  | 0.652        | 14.013           |
| Py + AC + AO         | 5.00                    | 0.00                    | 0.04                    | 0.043  | 0.935    | 27.848       | 18.324       | 34.820                  | 0.642        | 15.277           |
| Py + AC + AO         | 5.00                    | 0.00                    | 0.06                    | 0.039  | 0.940    | 27.445       | 18.058       | 38.010                  | 0.633        | 16.584           |
| Py + AC + AO         | 5.00                    | 0.00                    | 0.08                    | 0.036  | 0.945    | 26.999       | 17.765       | 41.930                  | 0.622        | 18.192           |
| Py + AC + AO         | 5.00                    | 0.00                    | 0.10                    | 0.034  | 0.948    | 26.747       | 17.600       | 44.350                  | 0.617        | 19.186           |
| Py + AC + AO         | 5.00                    | 0.00                    | 0.12                    | 0.032  | 0.951    | 26.416       | 17.381       | 47.800                  | 0.609        | 20.597           |
| Py + AC + AO         | 5.00                    | 0.00                    | 0.14                    | 0.029  | 0.955    | 26.084       | 17.163       | 51.560                  | 0.601        | 22.143           |
| Py + AC + AO         | 5.000                   | 0.000                   | 0.160                   | 0.027  | 0.959    | 25.624       | 16.860       | 57.380                  | 0.591        | 24.528           |
| <b>Py + AC + AO</b>  | 5.00                    | 0.00                    | 0.18                    | 0.025  | 0.962    | 25.333       | 16.669       | 61.450                  | 0.584        | 26.192           |
| <b>Py + AC + AO*</b> | 5.00                    | 0.00                    | 0.20                    | 0.024  | 0.962    | 25.273       | 16.629       | 62.330                  | 0.583        | 26.553           |

**Table S4.** Evaluated parameters for mixed solutions of Py (6.5  $\mu$ M), AC (9.1 mM) and AO (9.1 mM). (V: volume).

| Solution | V <sub>Py</sub><br>(mL) | V <sub>AC</sub><br>(mL) | V <sub>AO</sub><br>(mL) | $\Phi$ | $\Phi_r$ | $r_1$<br>(Å) | $r_3$<br>(Å) | $k_T (10^{-3})$<br>(ns) | $r_1/R_{01}$ | $\Phi_{st}/\Phi$ |
|----------|-------------------------|-------------------------|-------------------------|--------|----------|--------------|--------------|-------------------------|--------------|------------------|
| Py       | 5.00                    | 0.00                    | 0.00                    | 0.650  | 0.000    | —            | —            | —                       | —            | 1.000            |
| Py + AC  | 5.00                    | 0.02                    | 0.00                    | 0.368  | 0.434    | 45.344       | —            | 1.870                   | 1.045        | 1.766            |
| Py + AC  | 5.00                    | 0.04                    | 0.00                    | 0.258  | 0.603    | 40.449       | —            | 3.710                   | 0.933        | 2.520            |
| Py + AC  | 5.00                    | 0.060                   | 0.00                    | 0.190  | 0.707    | 37.446       | —            | 5.890                   | 0.863        | 3.415            |
| Py + AC  | 5.00                    | 0.08                    | 0.00                    | 0.139  | 0.786    | 34.908       | —            | 8.980                   | 0.805        | 4.680            |
| Py + AC  | 5.00                    | 0.10                    | 0.00                    | 0.103  | 0.841    | 32.844       | —            | 12.940                  | 0.757        | 6.305            |
| Py + AC  | 5.00                    | 0.12                    | 0.00                    | 0.081  | 0.876    | 31.323       | —            | 17.200                  | 0.722        | 8.051            |
| Py + AC  | 5.00                    | 0.14                    | 0.00                    | 0.064  | 0.902    | 29.972       | —            | 22.400                  | 0.691        | 10.185           |
| Py + AC  | 5.00                    | 0.16                    | 0.00                    | 0.048  | 0.926    | 28.484       | —            | 30.410                  | 0.657        | 13.468           |
| Py + AC  | 5.00                    | 0.18                    | 0.00                    | 0.040  | 0.939    | 27.482       | —            | 37.700                  | 0.634        | 16.458           |

|               |      |       |      |       |       |        |        |        |       |        |
|---------------|------|-------|------|-------|-------|--------|--------|--------|-------|--------|
| Py + AC*      | 5.00 | 0.20  | 0.00 | 0.031 | 0.952 | 26.363 | —      | 48.380 | 0.608 | 20.838 |
| Py + AC + AO  | 5.00 | 0.00  | 0.02 | 0.029 | 0.956 | 26.009 | 17.114 | 52.470 | 0.600 | 22.512 |
| Py + AC + AO  | 5.00 | 0.00  | 0.04 | 0.028 | 0.956 | 25.944 | 17.071 | 53.260 | 0.598 | 22.836 |
| Py + AC + AO  | 5.00 | 0.00  | 0.06 | 0.027 | 0.959 | 25.698 | 16.909 | 56.390 | 0.592 | 24.120 |
| Py + AC + AO  | 5.00 | 0.00  | 0.08 | 0.025 | 0.961 | 25.403 | 16.715 | 60.440 | 0.586 | 25.780 |
| Py + AC + AO  | 5.00 | 0.000 | 0.10 | 0.023 | 0.964 | 25.076 | 16.499 | 65.330 | 0.578 | 27.785 |
| Py + AC + AO  | 5.00 | 0.00  | 0.12 | 0.022 | 0.966 | 24.771 | 16.299 | 70.300 | 0.571 | 29.824 |
| Py + AC + AO  | 5.00 | 0.00  | 0.14 | 0.020 | 0.969 | 24.467 | 16.099 | 75.710 | 0.564 | 32.041 |
| Py + AC + AO  | 5.00 | 0.000 | 0.16 | 0.019 | 0.970 | 24.249 | 15.956 | 79.890 | 0.559 | 33.750 |
| Py + AC + AO  | 5.00 | 0.00  | 0.18 | 0.018 | 0.972 | 24.071 | 15.839 | 83.490 | 0.555 | 35.224 |
| Py + AC + AO* | 5.00 | 0.00  | 0.20 | 0.018 | 0.973 | 23.884 | 15.715 | 87.490 | 0.551 | 36.873 |
